# Supplementary material for: Suppression of PC-1/PrLZ sensitizes prostate cancer cells to ionizing radiation by attenuating DNA damage repair and inducing autophagic cell death
Source: PubMed Central journal article supplement (PMC5308731; doi:10.18632/oncotarget.11470), 2016-08-22
Supplement: oncotarget-07-62340-s001.pdf [file oncotarget-07-62340-s001.pdf]

## Suppression of PC-1/PrLZ sensitizes prostate cancer cells to ionizing radiation by attenuating DNA damage repair and inducing autophagic cell death

### SUPPLEMENTARY FIGURES

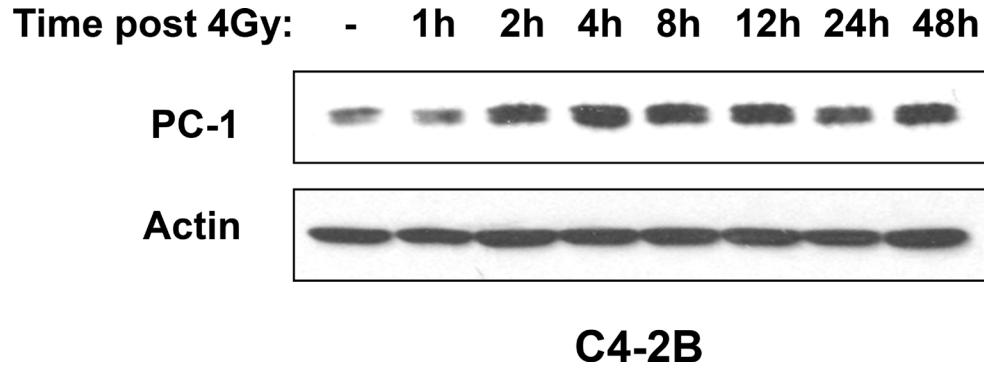

**Supplementary Figure S1: IR upregulated PC-1/PrLZ expression in prostate cancer cells.** A. PC-1/PrLZ expression was measured in prostate cancer C4-2B cells at different time points after 4-Gy irradiation.

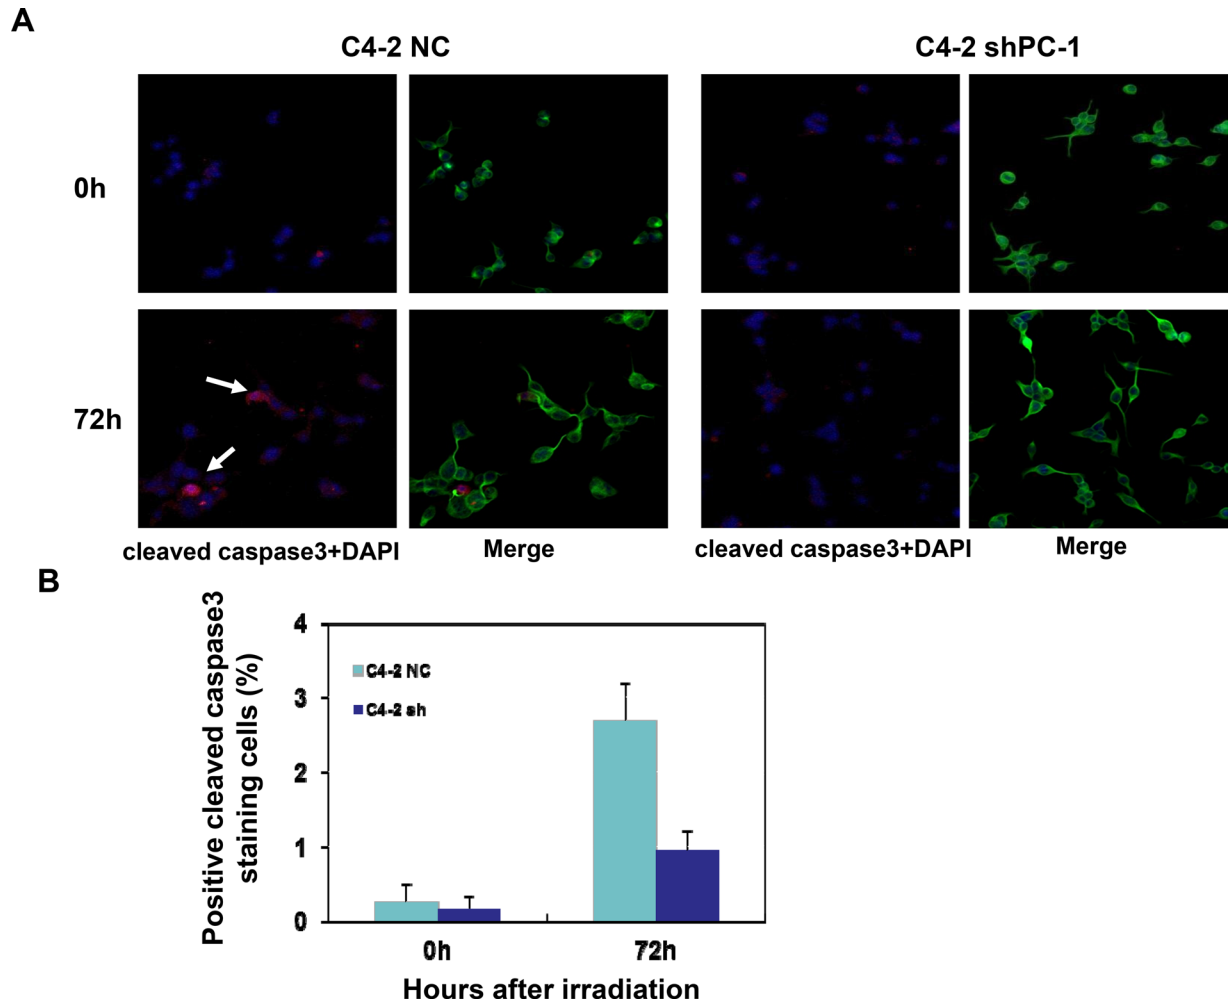

**Supplementary Figure S2: C4-2 subline apoptosis after 4-Gy IR.** A. C4-2 NC and C4-2 shPC-1 cells were IR or not and 3 days later stained with an antibody against caspase-3 and with DAPI (arrows, cleaved caspase-3-positive cells). B. Cleaved caspase-3 expression in C4-2 sublines.

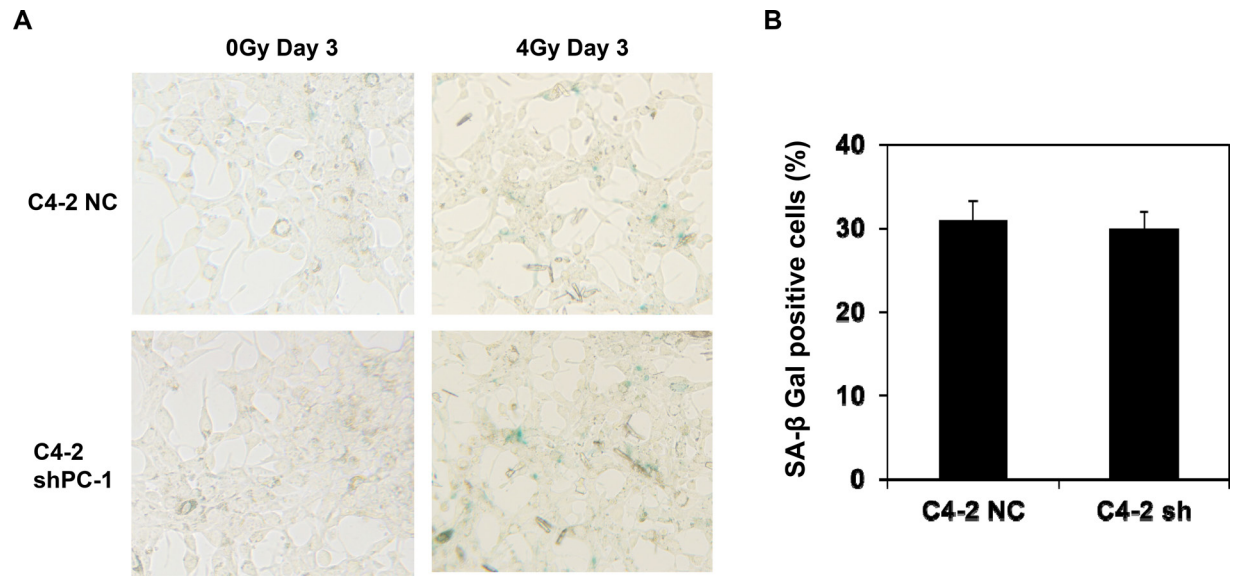

**Supplementary Figure S3: Loss of PC-1/PrLZ did not change IR-induced senescence in prostate cancer cells. A.** Representative image of SA-βGal activity after 72 h treatment. **B.** Quantitative analysis of senescent cells. Data are means  $\pm$  SD of three independent experiments.
